# Supplementary material for: The Effect of Blood Ketone Concentration and Exercise Intensity on Exogenous Ketone Oxidation Rates in Athletes
Source: PubMed Central journal article supplement — Med Sci Sports Exerc. 2020 Aug 31;53(3):505–16. doi: 10.1249/MSS.0000000000002502 (PMC7886359; doi:10.1249/mss.0000000000002502), 2020-08-31
Supplement: mss-53-505-s002.pdf [file mss-53-505-s002.pdf]

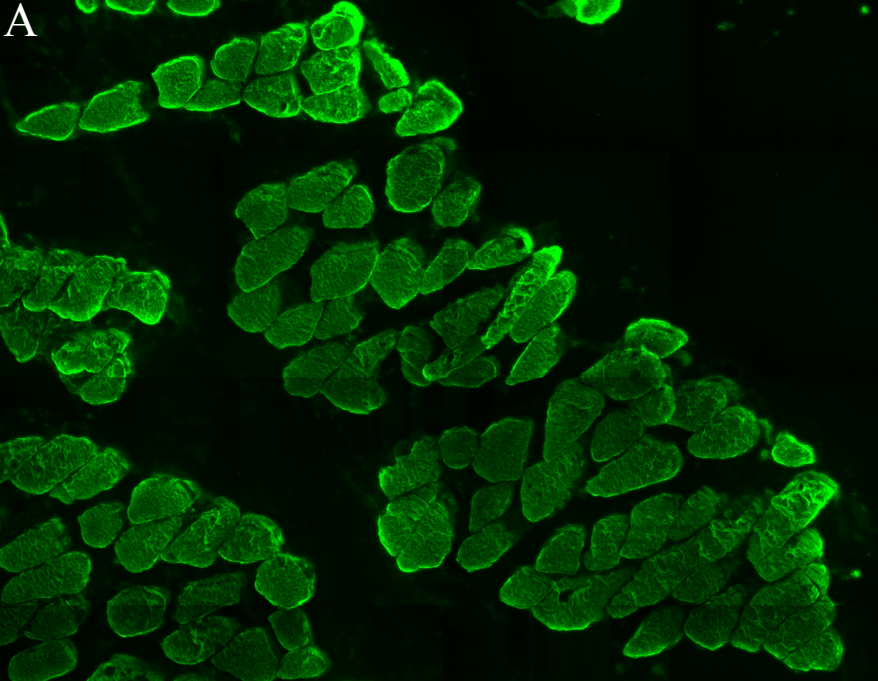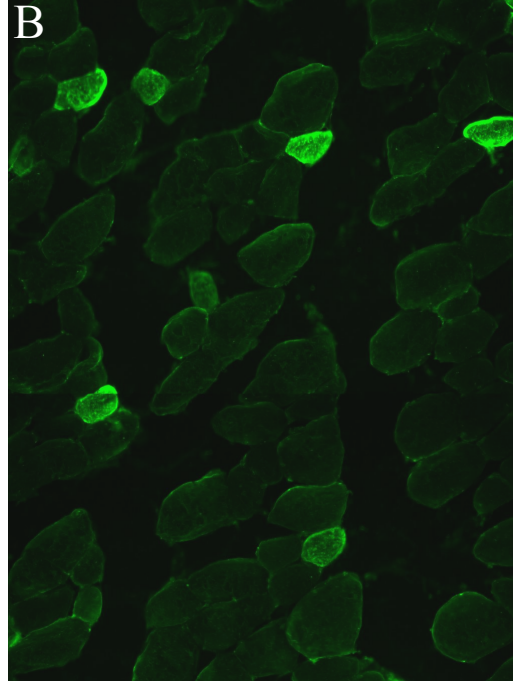

**SDC 2.** Images of rat **(A)** soleus (extremely slow-oxidative phenotype) and **(B)** extensor digitorum longus (extremely fast phenotype) muscle stained with an anti-slow skeletal myosin heavy chain primary antibody (fluorescent green)
