# Supplementary material for: The Effect of Blood Ketone Concentration and Exercise Intensity on Exogenous Ketone Oxidation Rates in Athletes
Source: PubMed Central journal article supplement — Med Sci Sports Exerc. 2020 Aug 31;53(3):505–16. doi: 10.1249/MSS.0000000000002502 (PMC7886359; doi:10.1249/mss.0000000000002502), 2020-08-31
Supplement: mss-53-505-s003.pdf [file mss-53-505-s003.pdf]

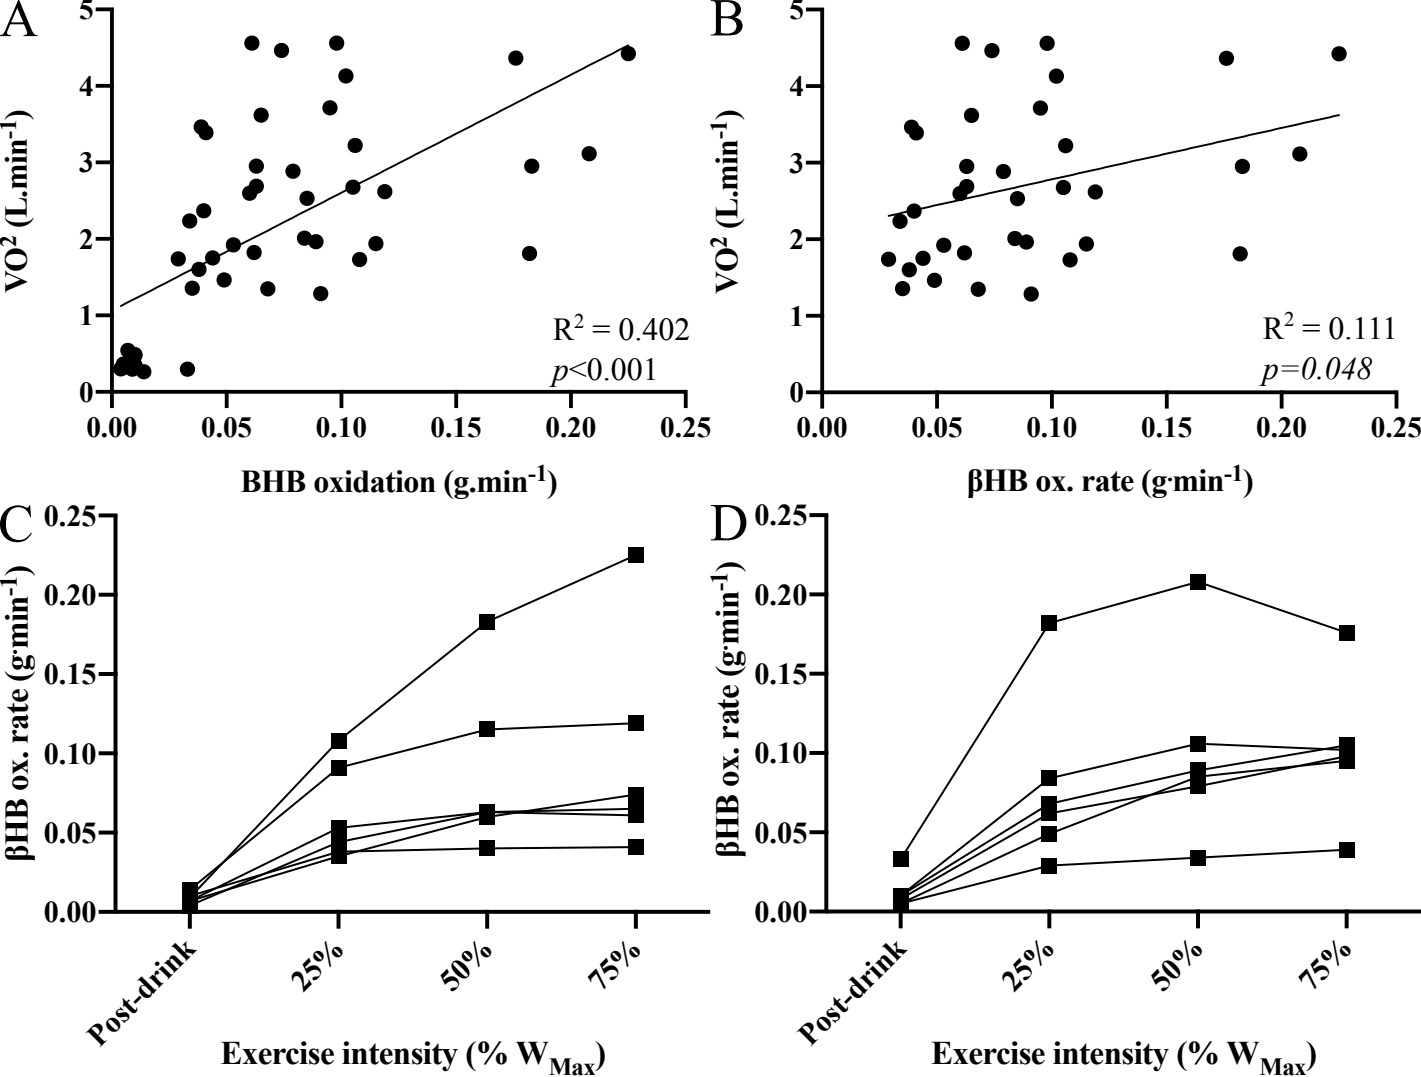

**SDC 4. Associations between exogenous BHB oxidation rate (A & B) and VO<sub>2</sub> and individual BHB oxidation rates (C & D).** (A) Including resting (post-drink) values. (B) Exercise values only. (C) Individual BHB oxidation rates in the low ketosis condition. (D) Individual βHB oxidation rates in the high ketosis condition. Values are expressed as means ± SD (n=6).
