# Supplementary material for: The Effect of Blood Ketone Concentration and Exercise Intensity on Exogenous Ketone Oxidation Rates in Athletes
Source: PubMed Central journal article supplement — Med Sci Sports Exerc. 2020 Aug 31;53(3):505–16. doi: 10.1249/MSS.0000000000002502 (PMC7886359; doi:10.1249/mss.0000000000002502), 2020-08-31
Supplement: mss-53-505-s004.pdf [file mss-53-505-s004.pdf]

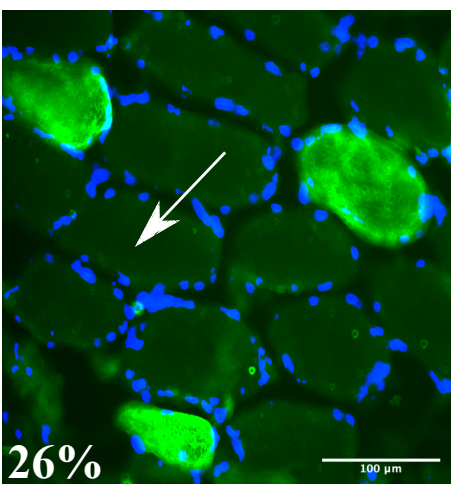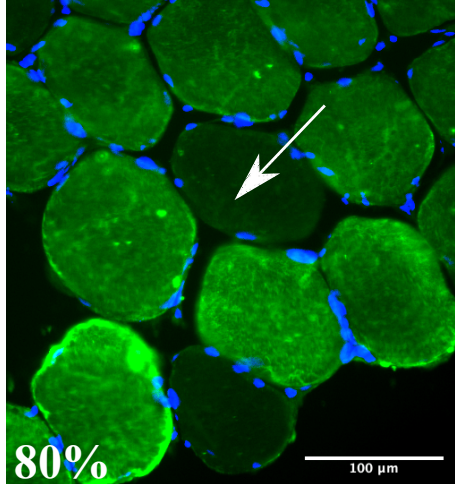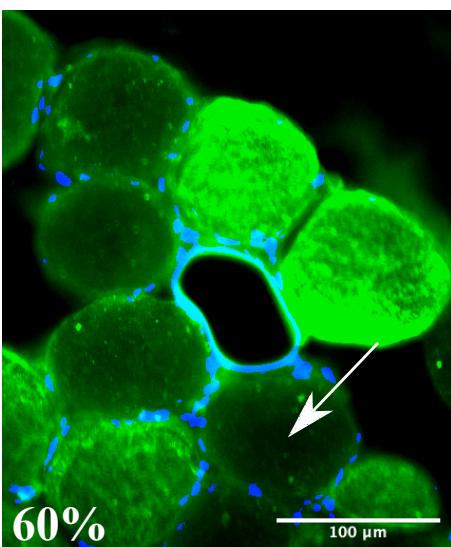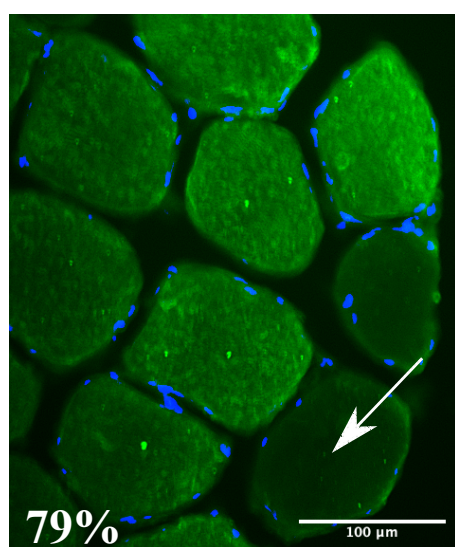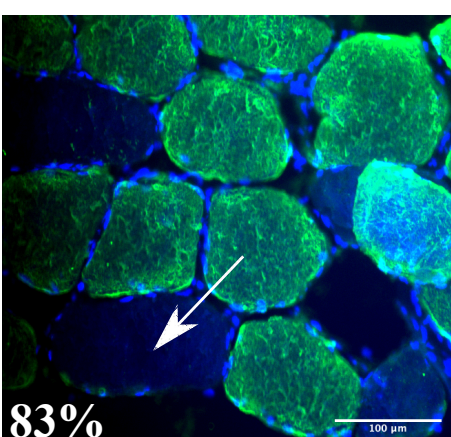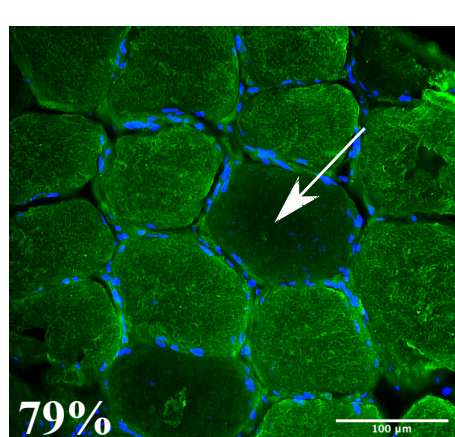

**SDC 6. Example images of vastus lateralis samples (n=6).**

*Vastus lateralis* biopsy samples stained with an anti-slow skeletal myosin heavy chain primary antibody (fluorescent green). Nuclei are represented in blue (stained with DAPI). Example non-stained fibres (representing fast-glycolytic (IIa) and fast (IIb) fibres) are indicated with the white arrow. Percentage represents the proportion of slow-oxidative fibres determined through manual counting (minimum 50 fibres) by a blinded assessor.
